# Supplementary material for: Comparison of Mobile Phone and CCD Cameras for Electrochemiluminescent Detection of Biogenic Amines
Source: MDPI journal article supplement (doi:10.3390/s22187008), 2022-09-16
Supplement: s1 [file s1]

## Supplemental Material for Comparison of Mobile Phone and CCD Cameras for Electrochemiluminescent Detection of Biogenic Amines

Nic Heckenlaible<sup>1</sup>, Sarah Snyder<sup>1</sup>, Patrick Herchenbach<sup>1</sup>, Alyssa Kava<sup>2</sup>, Charles S. Henry<sup>2</sup>, and Erin M. Gross<sup>1,\*</sup>

<sup>1</sup>Department of Chemistry and Biochemistry, Creighton University, Omaha, NE, USA

<sup>2</sup>Department of Chemistry, Colorado State University, Fort Collins, CO, USA

\*Corresponding Author E-mail Address eringross@creighton.edu

### Chemical structures and ECL mechanism

The chemical species 2-(dibutylamino)ethanol (DBAE) is a well-studied exemplary ECL co-reactant [1]. The mechanism for the oxidation-reduction ECL production between alkyl amines and  $\text{Ru}(\text{bpy})_3^{2+}$  is shown in Figure S2 [2-3]. The general scheme of the ECL mechanism involves the oxidation of both  $\text{Ru}(\text{bpy})_3^{2+}$  and co-reactant, after which the amine rearranges to form a free radical. The radical reduces  $\text{Ru}(\text{bpy})_3^{3+}$  in a process that creates an electronically excited  $^*\text{Ru}(\text{bpy})_3^{2+}$  state. Finally,  $^*\text{Ru}(\text{bpy})_3^{2+}$  relaxes to  $\text{Ru}(\text{bpy})_3^{2+}$  and emits a photon with a characteristic wavelength of 620nm.

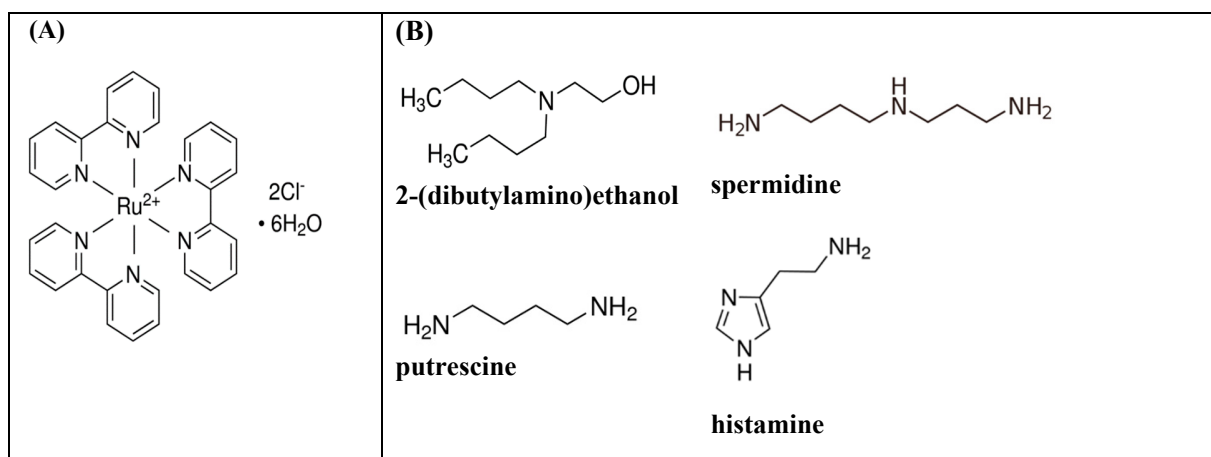

**Figure S1.** Structures of (A) tris(2,2'-bipyridyl)ruthenium(II) and (B) amines investigated in this work.

It has been noted that ECL mechanisms involving amines work most efficiently with tertiary amines [4], though secondary and primary amines may also be substituted with only a moderate decline in signal response. One such class of primary, secondary, and tertiary amines to which ECL studies have been applied are the biogenic amines.

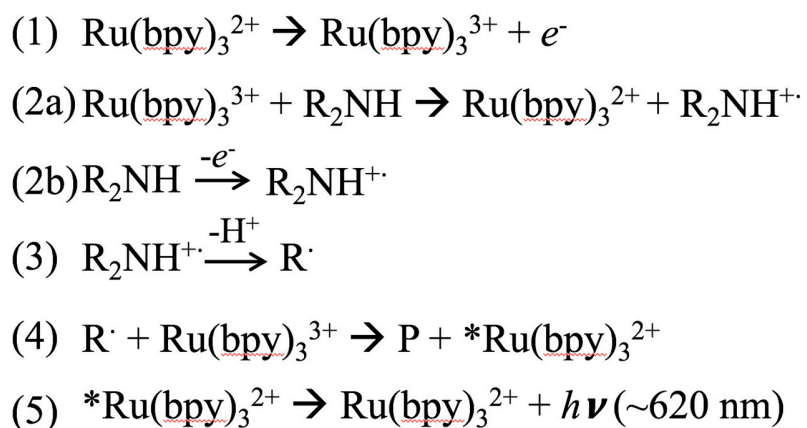

**Figure S2.** Mechanism of oxidative-reductive ECL mechanism of amines with  $\text{Ru}(\text{bpy})_3^{2+}$ .  $\text{R}^{\cdot}$  represents the strongly reducing free radical and P represents a product.

### Electrode Fabrication

Stencil-printed carbon electrodes were fabricated as described in the experimental section [5], with photographs of the process and the end product shown in Figure S3.

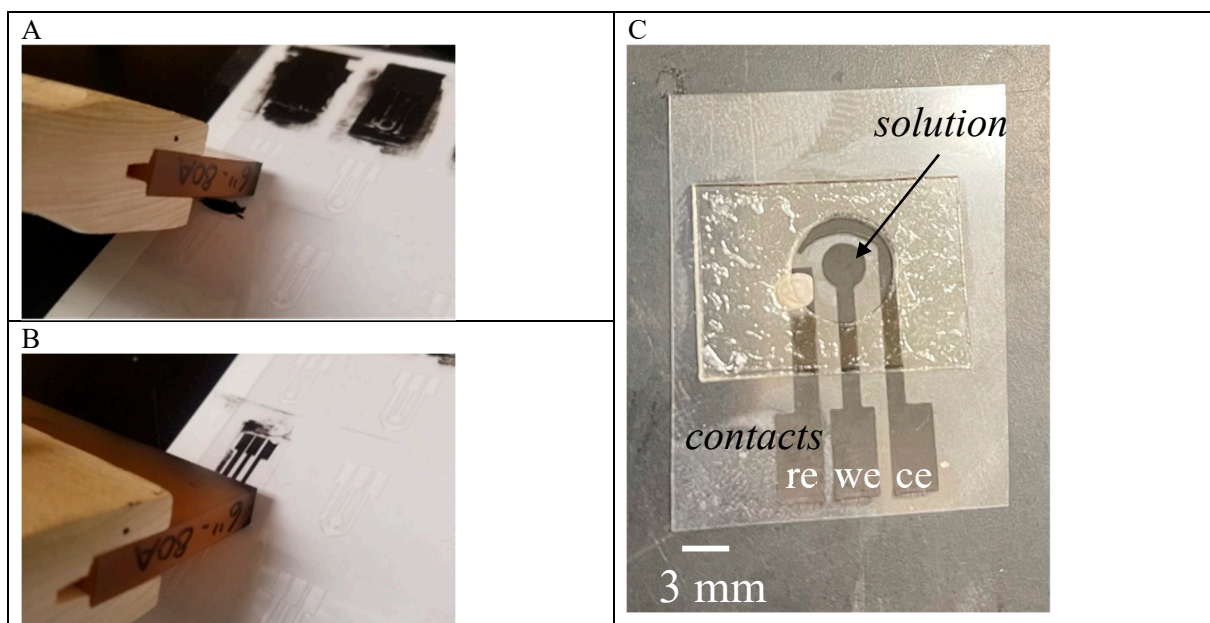

**Figure S3.** Stencil printing carbon paste through a laser-cut transparency stencil and (A-B) completed SPCE with reservoir attached (C). A few drops of solution are placed in the reservoir and contact is made to the reference (re), working (we) and counter (ce) electrodes via the contact pads at the bottom.

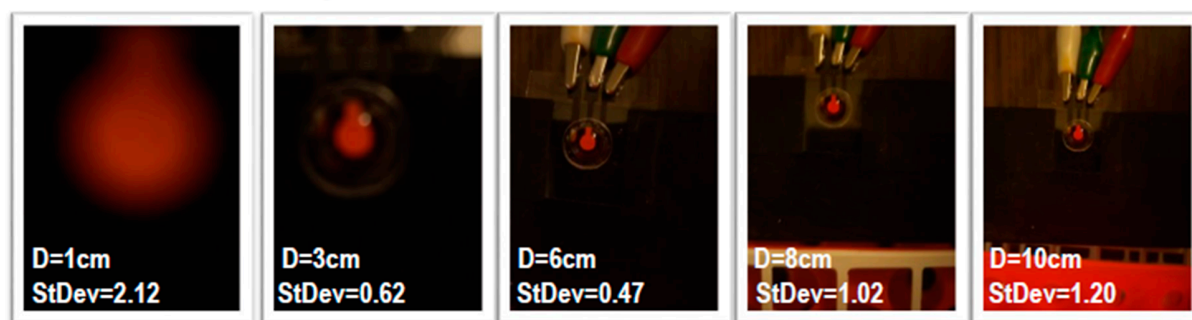

**Figure S4.** Photographs taken of a 3.0 mm diameter SPCE generating ECL from a solution of 5.0 mM Ru(bpy)<sub>3</sub><sup>2+</sup> and 0.050 mM DBAE under an applied potential of 1.10. Standard deviations were calculated from the image analysis of red pixel mean on ImageJ (n = 5).

### Cyclic voltammetry at stencil-printed electrodes

These electrodes are fabricated so that the working, counter and reference are each made from the carbon ink/graphite mixture. We investigated the effects of painting the reference with Ag paint on the stability of the cyclic voltammetry. Here, we looked at the CV's of the one-electron reduction of ferricyanide (Fe(CN)<sub>6</sub><sup>3-</sup>). For each reference electrode, five CV's were collected, with a two minute wait time in between. The data table shows the mean and standard deviations of the peak cathodic and anodic currents.

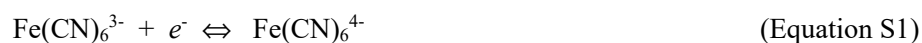

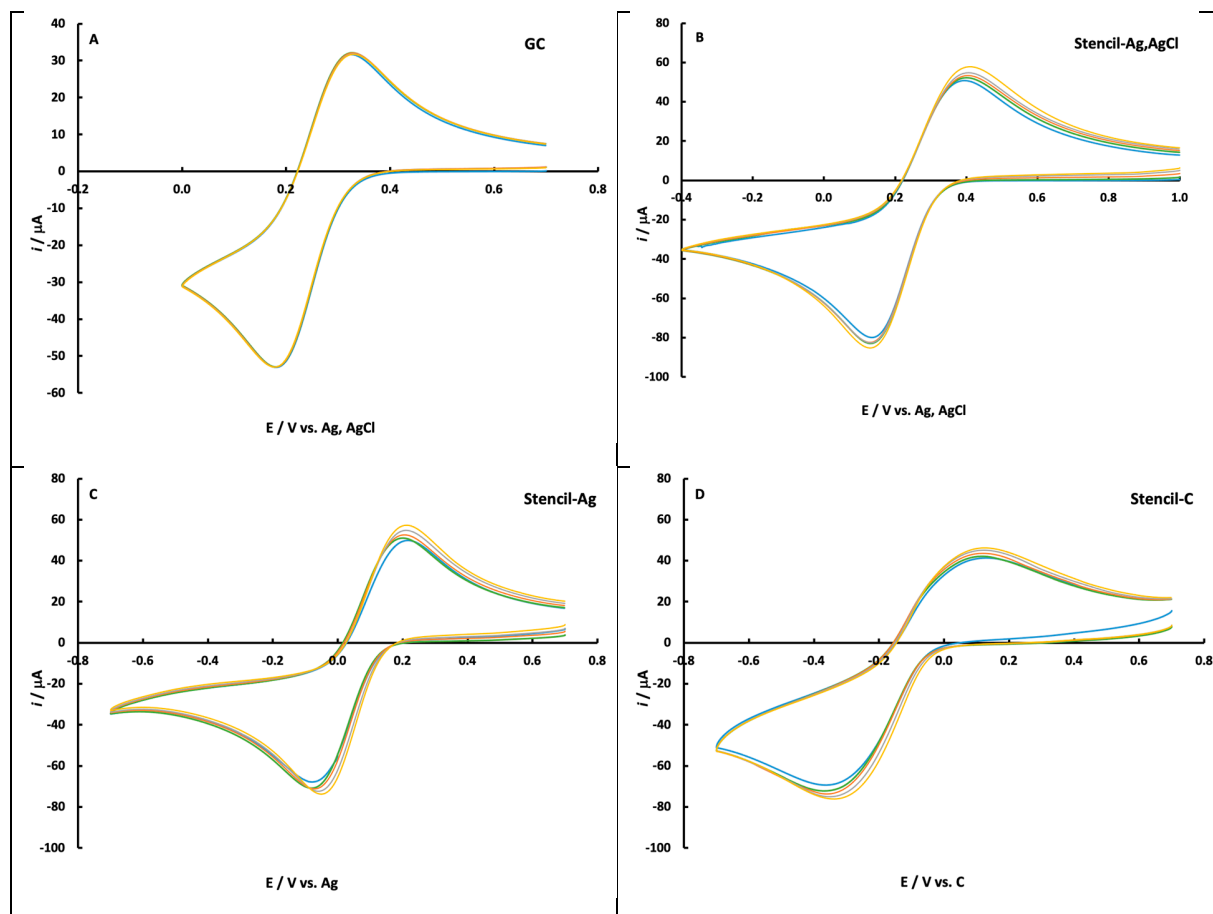

**Figure S5.** Intra-electrode cyclic voltammograms of 4.0 mM ferricyanide in 1.0 M KNO<sub>3</sub> at carbon electrodes ( $\nu = 0.10$  V/s). A) glassy carbon with Ag, AgCl reference and Pt counter electrode. Stencil-printed carbon with B) Ag, AgCl reference C) Ag paint reference and C) carbon reference. All stencil printed electrodes have a carbon counter electrode.

**Table S1: Intra-electrode CV data for the reduction of ferricyanide\***

| Working | Reference | $E_{1/2}$ (V)      | $\Delta E_p$ (mV) | $i_{pc}/i_{pa}$ |
|---------|-----------|--------------------|-------------------|-----------------|
| Stencil | Ag, AgCl  | $0.268 \pm 0.002$  | $272 \pm 8$       | $1.22 \pm 0.01$ |
| Stencil | Ag        | $0.110 \pm 0.005$  | $305 \pm 16$      | $1.16 \pm 0.02$ |
| Stencil | Carbon    | $-0.183 \pm 0.050$ | $308 \pm 54$      | $1.31 \pm 0.11$ |
| GC      | Ag, AgCl  | $0.254 \pm 0.001$  | $110 \pm 4$       | $1.21 \pm 0.01$ |

\*Mean  $\pm$  standard deviation (n = 5 for each electrode)

**Table S2: Inter-electrode CV data for the reduction of ferricyanide \***

| Working | Reference | $E_{1/2}$ (V)      | $\Delta E_p$ (mV) | $i_{pc}/i_{pa}$ |
|---------|-----------|--------------------|-------------------|-----------------|
| Stencil | Ag, AgCl  | $0.269 \pm 0.003$  | $350 \pm 7$       | $1.31 \pm 0.04$ |
| Stencil | Ag        | $0.101 \pm 0.008$  | $289 \pm 21$      | $1.13 \pm 0.05$ |
| Stencil | Carbon    | $-0.151 \pm 0.030$ | $384 \pm 34$      | $1.61 \pm 0.09$ |
| GC      | Ag, AgCl  | NA                 | NA                | NA              |

\*Mean  $\pm$  pooled standard deviation (3 electrodes, n = 5 for each electrode)

### Cyclic Voltammetry of $\text{Ru}(\text{bpy})_3^{2+}$

**Table S3: Electrochemical data for the oxidation of  $\text{Ru}(\text{bpy})_3^{2+}$  at stencil-printed electrodes**

| Scan rate (V/s) | $E_{1/2}$ (V) vs. Ag | $\Delta E_p$ (mV) | $i_{pa}/i_{pc}$ |
|-----------------|----------------------|-------------------|-----------------|
| 0.05            | 0.938                | 96                | 1.22            |
| 0.10            | 0.938                | 111               | 1.22            |
| 0.25            | 0.937                | 136               | 1.18            |
| 0.50            | 0.939                | 166               | 1.23            |
| 0.75            | 0.941                | 187               | 1.23            |

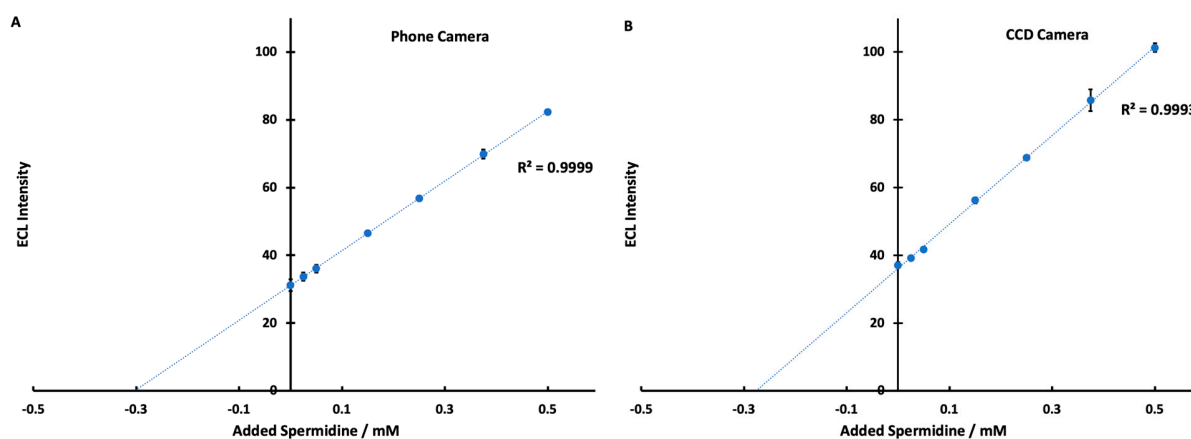

**Figure S6.** Multiple standard addition of 0-0.50 mM spermidine and 5.0 mM  $\text{Ru}(\text{bpy})_3^{2+}$  to 4x diluted centrifuged skim milk samples captured at 1.10 V with a (A) mobile phone camera and (B) CCD camera.

## References

1. Liu, X.; Shi, L.; Niu, W.; Li, H. and Xu, G. Environmentally Friendly and Highly Sensitive Ruthenium(II) Tris(2,2'-bipyridyl) Electrochemiluminescent System Using 2-(Dibutylamino)ethanol as Co-Reactant. *Angew. Chem. Int. Ed.* **2007**, *46*, 421-424. DOI: 10.1002/anie.200603491
2. Miao, W.; Choi, J.-P. and Bard, A.J. Electrogenenerated Chemiluminescence 69: The Tris(2,2'-bipyridine)ruthenium(II), (Ru(bpy)<sub>3</sub><sup>2+</sup>)/Tri-n-propylamine (TPrA) System Revisited-A New Route Involving TPrA<sup>•+</sup> Cation Radicals. *J. Am. Chem. Soc.* **2002**, *124*, 14478-14485. DOI:10.1021/ja027532v
3. Hu, L.; Xu, G. Applications and trends in electrochemiluminescence. *Chem. Soc. Rev.* **2010**, *39*, 3275–3304. <https://doi.org/10.1039/B923679C>.
4. Knight, A.W. and Greenway, G.M. Relationship between structural attributes and observed electrogenerated chemiluminescence (ECL) activity of tertiary amines as potential analytes for the tris(2,2'-bipyridine)ruthenium(II) ECL reaction. A review. *Analyst*, **1996**, *121*, 101R-106R. DOI:10.1039/AN996210101R
5. Martín-Yerga, D.; Álvarez-Martos, I.; Blanco-López, M.C.; Henry, C.S. and Fernández-Abedul, M.T. Point-of-Need simultaneous electrochemical detection of lead and cadmium using low-cost stencil-printed transparency electrodes. *Anal. Chim. Acta* **2017**, *981*, 24-33. DOI:10.1016/j.aca.2017.05.027
6. Heineman, W.R. and Kissinger, P.T. *Laboratory Techniques in Electroanalytical Chemistry*, 2<sup>nd</sup> Ed. Kissinger, P.T. and Heineman, W.R., Eds.; Marcel Dekker: New York, USA, 1996, pp 81-82.
7. Kissinger, P.T. and Heineman, W.R. Cyclic Voltammetry. *J. Chem. Ed.* **1983**, *60*, 702-706. DOI:10.1021/acs.jchemed.7b00361
